# Supplementary material for: Who Delivers without Water? A Multi Country Analysis of Water and Sanitation in the Childbirth Environment
Source: PubMed Central journal article supplement (PMC4988668; doi:10.1371/journal.pone.0160572), 2016-08-17
Supplement: pone.0160572.s004.pdf [file pone.0160572.s004.pdf]

To create the *delivery weights*, the standard survey sample weights provided in the SPA dataset were multiplied by the number of deliveries in the previous 12 months; this was then divided by the sum of all deliveries in the previous 12 months in that country.
