# Supplementary material for: Who Delivers without Water? A Multi Country Analysis of Water and Sanitation in the Childbirth Environment
Source: PubMed Central journal article supplement (PMC4988668; doi:10.1371/journal.pone.0160572), 2016-08-17
Supplement: pone.0160572.s006.pdf [file pone.0160572.s006.pdf]

## A)

| Country       | Survey year | Type of survey | Place of delivery | Improved safe water | Improved sanitation | Wealth index (quintiles) | Area | Maternal education |
|---------------|-------------|----------------|-------------------|---------------------|---------------------|--------------------------|------|--------------------|
| Afghanistan   | 2010        | MICS           | ✓                 | ✓                   | ✓                   | ✓                        | ✓    | ✓                  |
| Bangladesh    | 2011        | DHS            | ✓                 | ✓                   | ✓                   | ✓                        | ✓    | ✓                  |
| Benin         | 2011        | DHS            | ✓                 | ✓                   | ✓                   | ✓                        | ✓    | ✓                  |
| Bhutan        | 2010        | MICS           | ✓                 | ✓                   | ✓                   | ✓                        | ✓    | ✓                  |
| Burkina Faso  | 2010        | DHS            | ✓                 | ✓                   | ✓                   | ✓                        | ✓    | ✓                  |
| Burundi       | 2010        | DHS            | ✓                 | ✓                   | ✓                   | ✓                        | ✓    | ✓                  |
| CAR           | 2010        | MICS           | ✓                 | ✓                   | ✓                   | ✓                        | ✓    | ✓                  |
| Cambodia      | 2010*       | DHS            | ✓                 | ✘                   | ✓                   | ✓                        | ✓    | ✓                  |
| Cameroon      | 2011        | DHS            | ✓                 | ✓                   | ✓                   | ✓                        | ✓    | ✓                  |
| Chad          | 2010        | MICS           | ✓                 | ✓                   | ✓                   | ✓                        | ✓    | ✓                  |
| Comoros       | 2012        | DHS            | ✓                 | ✓                   | ✓                   | ✓                        | ✓    | ✓                  |
| Congo Brazz   | 2011        | DHS            | ✓                 | ✓                   | ✓                   | ✓                        | ✓    | ✓                  |
| Congo DR      | 2013        | DHS            | ✓                 | ✓                   | ✓                   | ✓                        | ✓    | ✓                  |
| Cote d'Ivoire | 2011        | DHS            | ✓                 | ✓                   | ✓                   | ✓                        | ✓    | ✓                  |
| Djibouti***   | 2006        | MICS           | ✓                 | ✓                   | ✓                   | ✘                        | ✓    | ✓                  |
| Egypt         | 2008        | DHS            | ✓                 | ✓                   | ✓                   | ✓                        | ✓    | ✓                  |
| Ethiopia      | 2011        | DHS            | ✓                 | ✓                   | ✓                   | ✓                        | ✓    | ✓                  |
| Gabon         | 2012        | DHS            | ✓                 | ✓                   | ✓                   | ✓                        | ✓    | ✓                  |
| Gambia        | 2013        | DHS            | ✓                 | ✓                   | ✓                   | ✓                        | ✓    | ✓                  |
| Ghana         | 2011        | MICS           | ✓                 | ✓                   | ✓                   | ✓                        | ✓    | ✓                  |
| Guinea        | 2012        | DHS            | ✓                 | ✓                   | ✓                   | ✓                        | ✓    | ✓                  |
| Guinea Bissau | 2006        | MICS           | ✓                 | ✓                   | ✓                   | ✓                        | ✓    | ✓                  |
| India         | 2005        | DHS            | ✓                 | ✓                   | ✓                   | ✓                        | ✓    | ✓                  |
| Indonesia     | 2012*       | DHS            | ✓                 | ✓                   | ✘                   | ✓                        | ✓    | ✓                  |
| Iraq          | 2011        | MICS           | ✓                 | ✓                   | ✓                   | ✓                        | ✓    | ✓                  |
| Jordan***     | 2012        | DHS            | ✓                 | ✓                   | ✓                   | ✓                        | ✓    | ✓                  |
| Kenya         | 2008        | DHS            | ✓                 | ✓                   | ✓                   | ✓                        | ✓    | ✓                  |
| Lao           | 2011        | MICS           | ✓                 | ✓                   | ✓                   | ✓                        | ✓    | ✓                  |
| Lesotho       | 2009        | DHS            | ✓                 | ✓                   | ✓                   | ✓                        | ✓    | ✓                  |
| Liberia       | 2013        | DHS            | ✓                 | ✓                   | ✓                   | ✓                        | ✓    | ✓                  |
| Madagascar    | 2008        | DHS            | ✓                 | ✓                   | ✓                   | ✓                        | ✓    | ✓                  |
| Malawi        | 2010        | DHS            | ✓                 | ✓                   | ✓                   | ✓                        | ✓    | ✓                  |
| Maldives      | 2009        | DHS            | ✓                 | ✓                   | ✓                   | ✓                        | ✓    | ✓                  |
| Mali          | 2012        | DHS            | ✓                 | ✓                   | ✓                   | ✓                        | ✓    | ✓                  |
| Mauritania    | 2011        | MICS           | ✓                 | ✓                   | ✓                   | ✓                        | ✓    | ✓                  |
| Mongolia***   | 2010        | MICS           | ✓                 | ✓                   | ✓                   | ✓                        | ✓    | ✓                  |
| Morocco       | 2003        | DHS            | ✓                 | ✓                   | ✓                   | ✓                        | ✓    | ✓                  |
| Mozambique    | 2011        | DHS            | ✓                 | ✓                   | ✓                   | ✓                        | ✓    | ✓                  |

|                       |                                                                                                              |      |   |   |   |   |   |   |
|-----------------------|--------------------------------------------------------------------------------------------------------------|------|---|---|---|---|---|---|
| Namibia               | 2013                                                                                                         | DHS  | ✓ | ✓ | ✓ | ✓ | ✓ | ✓ |
| Nepal                 | 2011                                                                                                         | DHS  | ✓ | ✓ | ✓ | ✓ | ✓ | ✓ |
| Niger                 | 2012                                                                                                         | DHS  | ✓ | ✓ | ✓ | ✓ | ✓ | ✓ |
| Nigeria               | 2013                                                                                                         | DHS  | ✓ | ✓ | ✓ | ✓ | ✓ | ✓ |
| Pakistan              | 2012                                                                                                         | DHS  | ✓ | ✓ | ✓ | ✓ | ✓ | ✓ |
| Philippines           | 2013                                                                                                         | DHS  | ✓ | ✓ | ✓ | ✓ | ✓ | ✓ |
| Rwanda                | 2010                                                                                                         | DHS  | ✓ | ✓ | ✓ | ✓ | ✓ | ✓ |
| S Tome & Principe     | 2008                                                                                                         | DHS  | ✓ | ✓ | ✓ | ✓ | ✓ | ✓ |
| Senegal               | 2014                                                                                                         | DHS  | ✓ | ✓ | ✓ | ✓ | ✓ | ✓ |
| Sierra Leone          | 2013                                                                                                         | DHS  | ✓ | ✓ | ✓ | ✓ | ✓ | ✓ |
| Somalia               | 2006                                                                                                         | MICS | ✓ | ✓ | ✓ | ✓ | ✓ | ✓ |
| South Sudan           | 2010                                                                                                         | MICS | ✓ | ✓ | ✓ | ✓ | ✓ | ✓ |
| State of Palestine*** | 2010                                                                                                         | MICS | ✓ | ✓ | ✓ | ✓ | ✓ | ✓ |
| Sudan                 | 2010                                                                                                         | MICS | ✓ | ✓ | ✓ | ✓ | ✓ | ✓ |
| Swaziland             | 2010                                                                                                         | MICS | ✓ | ✓ | ✓ | ✓ | ✓ | ✓ |
| Syria                 | 2006                                                                                                         | MICS | ✓ | ✓ | ✓ | ✓ | ✓ | ✓ |
| Tanzania              | 2010                                                                                                         | DHS  | ✓ | ✓ | ✓ | ✓ | ✓ | ✓ |
| Thailand***           | 2005                                                                                                         | MICS | ✓ | ✓ | ✓ | ✓ | ✓ | ✓ |
| Timor-Leste           | 2009                                                                                                         | DHS  | ✓ | ✓ | ✓ | ✓ | ✓ | ✓ |
| Togo                  | 2013                                                                                                         | DHS  | ✓ | ✓ | ✓ | ✓ | ✓ | ✓ |
| Tunisia***            | 2011                                                                                                         | MICS | ✓ | ✓ | ✓ | ✓ | ✓ | ✓ |
| Uganda                | 2011                                                                                                         | DHS  | ✓ | ✓ | ✓ | ✓ | ✓ | ✓ |
| Vanuatu***            | 2007                                                                                                         | MICS | ✓ | ✓ | ✓ | ✓ | ✓ | ✓ |
| Vietnam               | 2010                                                                                                         | MICS | ✓ | ✓ | ✓ | ✓ | ✓ | ✓ |
| Yemen                 | 2006                                                                                                         | MICS | ✓ | ✓ | ✓ | ✓ | ✓ | ✓ |
| Zambia                | 2007                                                                                                         | DHS  | ✓ | ✓ | ✓ | ✓ | ✓ | ✓ |
| Zimbabwe              | 2014                                                                                                         | MICS | ✓ | ✓ | ✓ | ✓ | ✓ | ✓ |
| ✓                     | Data available                                                                                               |      |   |   |   |   |   |   |
| ✘                     | Data available but it is not possible to recode original variable to follow standard definition for analyses |      |   |   |   |   |   |   |
| ✖                     | No data available                                                                                            |      |   |   |   |   |   |   |
| ***                   | Countries excluded from the analyses as the number of women who delivered at home was less than 100          |      |   |   |   |   |   |   |
| year*                 | These surveys were replaced by previous surveys with information for all variables used in the analyses:     |      |   |   |   |   |   |   |
|                       | Cambodia DHS 2010 was replaced by DHS 2000                                                                   |      |   |   |   |   |   |   |
|                       | Indonesia DHS 2012 was replaced by DHS 2007                                                                  |      |   |   |   |   |   |   |

B)

| World regions              | Total number of countries by world region according to the UNICEF classification | Number of countries included in the analyses |                            |                                  |                                 |
|----------------------------|----------------------------------------------------------------------------------|----------------------------------------------|----------------------------|----------------------------------|---------------------------------|
|                            |                                                                                  | National estimates                           | Stratified by wealth index | Stratified by maternal education | Stratified by area of residence |
| Eastern & Southern Africa  | 22                                                                               | 17                                           | 14                         | 15                               | 16                              |
| West & Central Africa      | 24                                                                               | 22                                           | 16                         | 21                               | 22                              |
| Middle East & North Africa | 20                                                                               | 6                                            | 6                          | 6                                | 7                               |
| South Asia                 | 8                                                                                | 7                                            | 6                          | 6                                | 6                               |
| East Asia & Pacific        | 27                                                                               | 6                                            | 5                          | 6                                | 5                               |
| Total                      | 101                                                                              | 58                                           | 47                         | 54                               | 56                              |
