# Supplementary material for: Who Delivers without Water? A Multi Country Analysis of Water and Sanitation in the Childbirth Environment
Source: PubMed Central journal article supplement (PMC4988668; doi:10.1371/journal.pone.0160572), 2016-08-17
Supplement: pone.0160572.s007.pdf [file pone.0160572.s007.pdf]

| <b>Country</b> | <b>DHS, year</b> | <b>SPA, year</b> |
|----------------|------------------|------------------|
| Kenya          | 2008-2009        | 2010             |
| Rwanda         | 2010             | 2007             |
| Uganda         | 2011             | 2007             |
| Tanzania       | 2010             | 2006             |
