# Supplementary material for: Who Delivers without Water? A Multi Country Analysis of Water and Sanitation in the Childbirth Environment
Source: PubMed Central journal article supplement (PMC4988668; doi:10.1371/journal.pone.0160572), 2016-08-17
Supplement: pone.0160572.s008.pdf [file pone.0160572.s008.pdf]

| <b>Country</b> | <b>Hospital</b> | <b>Health centre</b>         | <b>Dispensary</b>              |
|----------------|-----------------|------------------------------|--------------------------------|
| Kenya          | Hospitals       | Maternity and health centres | Dispensaries and clinics       |
| Rwanda         | Hospitals       | Health centres/polyclinic    | Health post/dispensary/clinics |
| Uganda         | Hospitals       | HC-IV, HC-III                | HC-II                          |
| Tanzania       | Hospitals       | Health Centre                | Dispensary/Stand alone         |
