# Supplementary material for: Who Delivers without Water? A Multi Country Analysis of Water and Sanitation in the Childbirth Environment
Source: PubMed Central journal article supplement (PMC4988668; doi:10.1371/journal.pone.0160572), 2016-08-17
Supplement: pone.0160572.s009.pdf [file pone.0160572.s009.pdf]

| Type                         | Tanzania                                                                                                                                                                                                            | Uganda                                                            | Rwanda                                               | Kenya                                                                        |
|------------------------------|---------------------------------------------------------------------------------------------------------------------------------------------------------------------------------------------------------------------|-------------------------------------------------------------------|------------------------------------------------------|------------------------------------------------------------------------------|
| <b>Respondent's own home</b> | Respondent's own home                                                                                                                                                                                               | Respondent's own home                                             | Respondent's own home                                | Respondent's own home                                                        |
| <b>Other</b>                 | Other home, other                                                                                                                                                                                                   | Other home, other, TBA, other public sector, other private sector | Other home, other, other public, other private       | Other home, en route to provider, other public, other private medical, other |
| <b>Hospital</b>              | Government (abbreviated to gov.) special or referral hospital, gov. regional hospital, gov. district hospital, specialised hospital (private), referral special hospital (religious), district hospital (religious) | Gov. hospital,                                                    | Gov. referral hospital, gov. district hospital       | Gov. hospital, maternity                                                     |
| <b>Health centre</b>         | Gov. health centre, health centre (private), health centre (religious)                                                                                                                                              | Gov. health centre                                                | Gov. health centre, private polyclinic               | Gov. health centre                                                           |
| <b>Dispensary/ clinic</b>    | Gov. dispensary or village health post, dispensary (private), dispensary (religious)                                                                                                                                | NA                                                                | Gov. health post, private clinic, private dispensary | Gov. dispensary                                                              |
| <b>Private</b>               | NA                                                                                                                                                                                                                  | Private hospital or clinic                                        | NA                                                   | NA                                                                           |
| <b>Mission</b>               | NA                                                                                                                                                                                                                  | NA                                                                | NA                                                   | Mission hospital or clinic/private hospital or clinic                        |
