# Supplementary material for: Who Delivers without Water? A Multi Country Analysis of Water and Sanitation in the Childbirth Environment
Source: PubMed Central journal article supplement (PMC4988668; doi:10.1371/journal.pone.0160572), 2016-08-17
Supplement: pone.0160572.s010.pdf [file pone.0160572.s010.pdf]

## Tanzania

| <b>Regional classification<br/>in our dataset</b> | <b>SPA details</b>                     | <b>DHS details</b>                                                    |
|---------------------------------------------------|----------------------------------------|-----------------------------------------------------------------------|
| Western                                           | Tabora, Shinyanga,<br>Kigoma           | Tabora, Shinyanga,<br>Kigoma                                          |
| Northern                                          | Kilimanjaro, Tanga,<br>Arusha, Manyara | Kilimanjaro, Tanga,<br>Arusha, Manyara                                |
| Central                                           | Dodoma, Singida                        | Dodoma, Singida                                                       |
| Southern Highlands                                | Mbeya, Iringa, Rukwa                   | Mbeya, Iringa, Rukwa                                                  |
| Lake                                              | Kagera, Mwanza, Mara                   | Kagera, Mwanza, Mara                                                  |
| Eastern                                           | Dar es Salaam, Coast,<br>Morogoro      | Dar es Salaam, Pwani,<br>Morogoro                                     |
| Southern                                          | Lindi, Mtwara, Ruvuma                  | Lindi, Mtwara, Ruvuma                                                 |
| Zanzibar                                          | Unguja, Pemba                          | Unguja North, Unguja<br>South, Town West, Pemba<br>North, Pemba South |

## Uganda

| <b>Regional classification<br/>in our dataset</b> | <b>DHS</b>           | <b>SPA</b>                                                                |
|---------------------------------------------------|----------------------|---------------------------------------------------------------------------|
| Kampala                                           | Kampala              | Kampala                                                                   |
| Central                                           | Central 1, Central 2 | Central                                                                   |
| East central                                      | East central         | East central                                                              |
| Eastern                                           | Eastern              | Eastern                                                                   |
| North                                             | North, Karamoja      | North eastern (including<br>most districts of<br>Karamoja), North central |
| West Nile                                         | West Nile            | West Nile                                                                 |
| Western                                           | Western              | Western                                                                   |
| South West                                        | South West           | South West                                                                |
