# Supplementary material for: Who Delivers without Water? A Multi Country Analysis of Water and Sanitation in the Childbirth Environment
Source: PubMed Central journal article supplement (PMC4988668; doi:10.1371/journal.pone.0160572), 2016-08-17
Supplement: pone.0160572.s011.pdf [file pone.0160572.s011.pdf]

| World region              | Country       | Unweighted N | Weighted N | Improved WATSAN |     | Improved water source |     | Improved sanitation facility |     |
|---------------------------|---------------|--------------|------------|-----------------|-----|-----------------------|-----|------------------------------|-----|
|                           |               |              |            | %               | SE  | %                     | SE  | %                            | SE  |
| Eastern & Southern Africa | Madagascar    | 6866         | 7125.0     | 0.1             | 0.0 | 24.2                  | 1.6 | 0.3                          | 0.1 |
|                           | Tanzania      | 3455         | 3504.3     | 1.8             | 0.4 | 41.8                  | 2.7 | 3.8                          | 0.6 |
|                           | Zambia        | 2843         | 2931.1     | 2.7             | 0.5 | 20.4                  | 1.7 | 10.9                         | 1.1 |
|                           | Malawi        | 2588         | 2314.0     | 3.1             | 0.5 | 72.2                  | 1.9 | 4.1                          | 0.6 |
|                           | Ethiopia      | 9293         | 9870.1     | 3.3             | 0.4 | 42.1                  | 2.5 | 6.1                          | 0.6 |
|                           | Uganda        | 2558         | 2599.8     | 5.6             | 0.8 | 64.1                  | 2.8 | 8.3                          | 1.0 |
|                           | Namibia       | 655          | 536.6      | 8.5             | 1.7 | 77.4                  | 3.1 | 8.9                          | 1.7 |
|                           | South Sudan   | 3505         | 3480.7     | 8.6             | 1.0 | 68.6                  | 1.8 | 11.1                         | 1.1 |
|                           | Kenya         | 3022         | 2883.0     | 9.3             | 1.5 | 49.4                  | 3.4 | 13.4                         | 1.7 |
|                           | Somalia       | 1800         | 1777.3     | 11.2            | 1.5 | 19.7                  | 2.3 | 28.6                         | 2.4 |
|                           | Lesotho       | 1387         | 1198.6     | 11.8            | 1.4 | 68.5                  | 3.1 | 14.0                         | 1.5 |
|                           | Mozambique    | 288          | 288.0      | 14.9            | 2.8 | 51.9                  | 5.0 | 20.7                         | 3.3 |
|                           | Comoros       | 674          | 665.4      | 18.4            | 2.5 | 75.3                  | 4.2 | 22.3                         | 3.1 |
|                           | Burundi       | 2495         | 2762.6     | 24.1            | 1.8 | 72.1                  | 2.3 | 32.4                         | 2.2 |
|                           | Zimbabwe      | 422          | 423.1      | 32.3            | 3.0 | 56.6                  | 3.5 | 41.8                         | 3.0 |
|                           | Swaziland     | 141          | 145.8      | 34.0            | 4.5 | 52.6                  | 4.3 | 58.1                         | 5.2 |
|                           | Rwanda        | 2434         | 2471.4     | 36.9            | 1.6 | 65.2                  | 1.9 | 55.3                         | 1.5 |
|                           | <b>Mean</b>   |              |            | 13.3            |     | 54.2                  |     | 20.0                         |     |
|                           | <b>Median</b> |              |            | 9.3             |     | 56.6                  |     | 13.4                         |     |
| West & Central Africa d   | Benin         | 1635         | 1493.4     | 1.2             | 0.5 | 62.8                  | 3.3 | 1.5                          | 0.5 |
|                           | Togo          | 2116         | 1746.7     | 1.3             | 0.3 | 40.0                  | 3.1 | 1.6                          | 0.4 |
|                           | Congo Brazz   | 1141         | 545.3      | 1.4             | 0.7 | 27.1                  | 3.8 | 2.0                          | 0.9 |
|                           | Congo DR      | 3890         | 2902.5     | 2.1             | 0.5 | 18.1                  | 2.3 | 12.9                         | 1.7 |
|                           | Guinea Bissau | 1307         | 1384.4     | 2.4             | 0.5 | 50.1                  | 2.5 | 3.3                          | 0.6 |
|                           | Burkina Faso  | 4571         | 4965.3     | 3.3             | 0.6 | 61.9                  | 2.2 | 3.9                          | 0.6 |
|                           | Niger         | 7692         | 8924.9     | 3.7             | 0.5 | 59.7                  | 2.2 | 4.4                          | 0.5 |
|                           | Sierra Leone  | 3339         | 3531.6     | 3.9             | 0.6 | 43.3                  | 3.0 | 6.3                          | 0.8 |
|                           | Cote d'Ivoire | 3160         | 2822.5     | 5.8             | 0.8 | 64.9                  | 3.4 | 6.7                          | 0.9 |
|                           | Liberia       | 2344         | 1685.3     | 6.0             | 1.0 | 58.1                  | 3.5 | 6.9                          | 1.1 |
|                           | Gabon         | 934          | 339.3      | 6.4             | 1.5 | 70.8                  | 3.3 | 6.5                          | 1.5 |
|                           | Mauritania    | 941          | 864.5      | 7.1             | 1.1 | 38.7                  | 2.8 | 13.9                         | 1.7 |
|                           | Chad          | 4788         | 4968.4     | 7.2             | 0.9 | 46.0                  | 2.6 | 8.6                          | 1.0 |
|                           | Mali          | 3876         | 4031.1     | 8.4             | 1.1 | 51.2                  | 2.7 | 12.9                         | 1.2 |
|                           | Guinea        | 3598         | 3505.4     | 8.6             | 1.1 | 64.9                  | 2.9 | 10.6                         | 1.2 |

|                            |                   |       |         |      |     |      |     |      |     |
|----------------------------|-------------------|-------|---------|------|-----|------|-----|------|-----|
|                            | CAR               | 1831  | 1796.2  | 10.6 | 1.4 | 50.5 | 2.9 | 15.7 | 1.5 |
|                            | Senegal           | 1969  | 1313.7  | 15.4 | 2.2 | 60.4 | 4.7 | 19.2 | 2.4 |
|                            | Cameroon          | 4044  | 4220.8  | 16.8 | 1.9 | 47.7 | 2.9 | 29.8 | 2.4 |
|                            | S Tome & Principe | 387   | 318.8   | 17.4 | 3.0 | 92.2 | 2.4 | 19.3 | 3.1 |
|                            | Nigeria           | 17180 | 18043.8 | 20.7 | 1.5 | 47.5 | 2.1 | 33.6 | 1.7 |
|                            | Ghana             | 1116  | 667.8   | 23.6 | 2.4 | 59.9 | 2.8 | 36.2 | 2.8 |
|                            | Gambia            | 3303  | 2809.0  | 26.4 | 2.9 | 86.8 | 1.8 | 30.2 | 3.1 |
|                            | <b>Mean</b>       |       |         | 9.1  |     | 54.7 |     | 13.0 |     |
|                            | <b>Median</b>     |       |         | 6.7  |     | 54.7 |     | 9.6  |     |
| Middle East & North Africa | Sudan             | 4508  | 4395.5  | 14.2 | 1.2 | 53.2 | 2.1 | 22.9 | 1.4 |
|                            | Yemen             | 1140  | 1160.3  | 26.5 | 2.8 | 51.3 | 3.6 | 39.9 | 3.3 |
|                            | Morocco           | 2508  | 2285.3  | 34.7 | 2.7 | 50.9 | 3.2 | 53.5 | 2.4 |
|                            | Iraq              | 1539  | 976.1   | 70.5 | 2.2 | 72.9 | 2.1 | 93.4 | 1.0 |
|                            | Syria             | 1049  | 1048.7  | 82.1 | 2.1 | 84.4 | 2.1 | 95.1 | 1.0 |
|                            | Egypt             | 2958  | 2760.1  | 86.8 | 1.1 | 97.4 | 0.8 | 89.3 | 0.8 |
|                            | <b>Mean</b>       |       |         | 52.5 |     | 68.4 |     | 65.7 |     |
|                            | <b>Median</b>     |       |         | 52.6 |     | 63.1 |     | 71.4 |     |
| South Asia                 | India             | 24640 | 28979.8 | 9.9  | 0.5 | 83.9 | 0.8 | 10.6 | 0.5 |
|                            | Afghanistan       | 2633  | 2735.1  | 17.4 | 2.3 | 51.0 | 2.5 | 24.8 | 2.5 |
|                            | Nepal             | 3253  | 3333.6  | 20.4 | 1.9 | 83.6 | 2.5 | 22.6 | 2.0 |
|                            | Bangladesh        | 6341  | 6584.0  | 27.3 | 1.1 | 98.3 | 0.4 | 27.9 | 1.1 |
|                            | Pakistan          | 5502  | 5671.3  | 28.4 | 2.4 | 52.8 | 3.5 | 43.8 | 2.8 |
|                            | Bhutan            | 956   | 849.2   | 46.9 | 2.6 | 95.2 | 1.0 | 48.4 | 2.6 |
|                            | Maldives          | 140   | 113.3   | 87.7 | 3.7 | 98.2 | 1.3 | 88.8 | 3.6 |
|                            | <b>Mean</b>       |       |         | 34.0 |     | 80.4 |     | 38.1 |     |
|                            | <b>Median</b>     |       |         | 27.3 |     | 83.9 |     | 27.9 |     |
| East Asia & Pacific        | Cambodia          | 7897  | 7162.6  | 2.4  | 0.3 | 26.7 | 1.9 | 6.8  | 0.7 |
|                            | Vietnam           | 139   | 100.7   | 21.3 | 5.3 | 56.0 | 7.8 | 32.8 | 6.3 |
|                            | Timor-Leste       | 7893  | 7623.6  | 24.5 | 1.3 | 59.0 | 1.7 | 34.2 | 1.4 |
|                            | Lao               | 2705  | 2486.9  | 25.1 | 1.6 | 60.3 | 2.2 | 34.6 | 1.9 |
|                            | Indonesia         | 10253 | 8228.0  | 25.2 | 1.2 | 51.3 | 1.6 | 40.4 | 1.4 |
|                            | Philippines       | 2812  | 2489.6  | 45.8 | 1.7 | 88.5 | 1.3 | 49.1 | 1.7 |
|                            | <b>Mean</b>       |       |         | 24.0 |     | 57.0 |     | 33.0 |     |
|                            | <b>Median</b>     |       |         | 24.8 |     | 57.5 |     | 34.4 |     |
