# Supplementary material for: Who Delivers without Water? A Multi Country Analysis of Water and Sanitation in the Childbirth Environment
Source: PubMed Central journal article supplement (PMC4988668; doi:10.1371/journal.pone.0160572), 2016-08-17
Supplement: pone.0160572.s012.pdf [file pone.0160572.s012.pdf]

|                                                          | <b>KENYA</b> | <b>TANZANIA</b> | <b>UGANDA</b> | <b>RWANDA</b> |
|----------------------------------------------------------|--------------|-----------------|---------------|---------------|
|                                                          | %            | %               | %             | %             |
| <b>NOT Piped</b>                                         | 56.5         | 63.5            | 79.7          | 37.4          |
| <b>Source of water is NOT on site (within 500m)</b>      | 8.2          | 39.9            | 13.2          | 26.8          |
| <b>Routine time of the year with a shortage of water</b> | 46.1         | 52.0            | 49.5          | 60.2          |
| <b>NOT improved in the delivery room</b>                 | 16.1         | 52.3            | 29.2          | 39.8          |
